# Supplementary material for: Untangling the Complexity of Small-Scale Fisheries: Building an Understanding of Grouper-Snapper Fisheries Dynamics in Saleh Bay, West Nusa Tenggara, Indonesia
Source: MDPI journal article supplement (doi:10.3390/fishes9010002), 2023-12-19

## Supplementary Table S2. Model Selection and Results of Generalized Additive Modeling (GAM)

### 3.1 Model fitting selection

| Model                                      | AIC       | Adjusted R <sup>2</sup> | Deviance explained (%) |
|--------------------------------------------|-----------|-------------------------|------------------------|
| GLM, <i>Plectropomus leopardus</i>         | 2,964.900 | 0.261                   | 26.1                   |
| <b>GAM, <i>Plectropomus leopardus</i>*</b> | 2,927.035 | 0.391                   | 40.4                   |
| GLM, <i>Plectropomus maculatus</i>         | 2,295.100 | 0.186                   | 18.6                   |
| <b>GAM, <i>Plectropomus maculatus</i>*</b> | 2,246.611 | 0.142                   | 29.4                   |
| GLM, <i>Epinephelus coioides</i>           | 2,491.600 | 0.151                   | 15.1                   |
| <b>GAM, <i>Epinephelus coioides</i>*</b>   | 2,450.196 | 0.170                   | 24.9                   |
| GLM, <i>Lutjanus malabaricus</i>           | 5,405.300 | 0.277                   | 27.7                   |
| <b>GAM, <i>Lutjanus malabaricus</i>*</b>   | 5,398.663 | 0.136                   | 26.9                   |

\*Selected model

GLM: Generalized Linear Modeling; GAM: Generalized Additive Modeling

### 3.2 Results of Generalized Additive Modeling

#### 3.2.1 *Plectropomus leopardus*

Formula:

Pleopardus ~ Y2 + M + s(TH, bs = "cr") + G + s(Depth, bs = "cr") + s(GT, bs = "cr", k = 5) + s(P\_Pleopardus, bs = "cr", k = 56)

Parametric coefficients:

|                                | Estimate  | Std. Error | z value | Pr(> z ) |     |
|--------------------------------|-----------|------------|---------|----------|-----|
| (Intercept)                    | 0.488474  | 0.149396   | 3.270   | 0.001077 | **  |
| Y22017                         | -0.178580 | 0.098849   | -1.807  | 0.070825 | .   |
| Y22018                         | -0.332087 | 0.111266   | -2.985  | 0.002839 | **  |
| Y22019                         | -0.461043 | 0.121389   | -3.798  | 0.000146 | *** |
| M.L                            | -0.031030 | 0.112138   | -0.277  | 0.782000 |     |
| M.Q                            | 0.011999  | 0.102926   | 0.117   | 0.907194 |     |
| M.C                            | 0.101244  | 0.091767   | 1.103   | 0.269911 |     |
| M^4                            | 0.100273  | 0.093777   | 1.069   | 0.284945 |     |
| M^5                            | -0.143414 | 0.095824   | -1.497  | 0.134485 |     |
| M^6                            | 0.035310  | 0.092998   | 0.380   | 0.704182 |     |
| M^7                            | -0.012741 | 0.096587   | -0.132  | 0.895053 |     |
| M^8                            | -0.005839 | 0.092696   | -0.063  | 0.949777 |     |
| M^9                            | -0.077002 | 0.086631   | -0.889  | 0.374084 |     |
| M^10                           | 0.033348  | 0.087193   | 0.382   | 0.702119 |     |
| M^11                           | 0.021700  | 0.087125   | 0.249   | 0.803305 |     |
| GPanah (Speargun)              | 0.634525  | 0.169741   | 3.738   | 0.000185 | *** |
| GPancing tonda (Troll line)    | -0.064009 | 0.175957   | -0.364  | 0.716027 |     |
| GPancing ulur (Handline)       | -0.178503 | 0.141118   | -1.265  | 0.205900 |     |
| GRawai dasar (Bottom longline) | -0.136980 | 0.118803   | -1.153  | 0.248911 |     |

---  
Signif. codes: 0 '\*\*\*' 0.001 '\*\*' 0.01 '\*' 0.05 '.' 0.1 ' ' 1

Approximate significance of smooth terms:

|                 | edf    | Ref.df | Chi.sq | p-value  |     |
|-----------------|--------|--------|--------|----------|-----|
| s(TH)           | 1.881  | 2.285  | 14.659 | 0.00121  | **  |
| s(Depth)        | 2.624  | 3.326  | 8.253  | 0.06415  | .   |
| s(GT)           | 2.497  | 2.904  | 2.739  | 0.46595  |     |
| s(P_Pleopardus) | 36.812 | 41.502 | 89.643 | 2.28e-05 | *** |

---

Signif. codes: 0 '\*\*\*' 0.001 '\*\*' 0.01 '\*' 0.05 '.' 0.1 ' ' 1

R-sq.(adj) = 0.352 Deviance explained = 37.2%  
 UBRE = -0.47636 Scale est. = 1 n = 1014

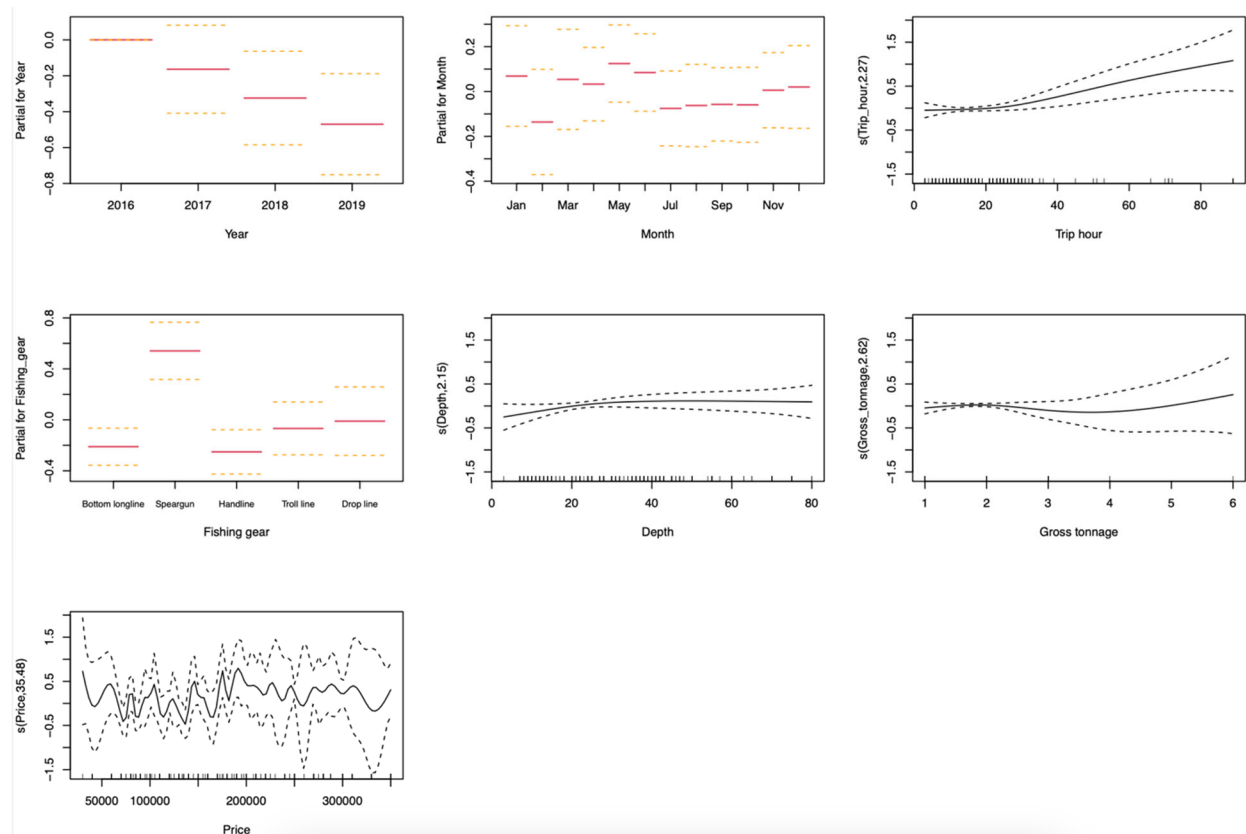

### 3.2.2 *Plectropomus maculatus*

Family: poisson  
 Link function: log

Formula:

$\text{Pmaculatus} \sim Y2 + M + s(\text{TH}, \text{bs} = "cr", k = 30) + G + s(\text{Depth}, \text{bs} = "cr") + s(\text{GT}, \text{bs} = "cr", k = 5) + s(\text{P\_Pmaculatus}, \text{bs} = "cr")$

Parametric coefficients:

|             | Estimate  | Std. Error | z      | value    | Pr(> z ) |  |
|-------------|-----------|------------|--------|----------|----------|--|
| (Intercept) | 0.782981  | 0.212122   | 3.691  | 0.000223 | ***      |  |
| Y22017      | 0.006185  | 0.097611   | 0.063  | 0.949475 |          |  |
| Y22018      | 0.007669  | 0.108537   | 0.071  | 0.943669 |          |  |
| Y22019      | -0.112164 | 0.129158   | -0.868 | 0.385161 |          |  |
| M.L         | -0.230402 | 0.126710   | -1.818 | 0.069013 | .        |  |
| M.Q         | -0.025370 | 0.114738   | -0.221 | 0.825003 |          |  |
| M.C         | -0.067707 | 0.110819   | -0.611 | 0.541220 |          |  |

|                                |           |          |        |              |
|--------------------------------|-----------|----------|--------|--------------|
| M^4                            | 0.079717  | 0.114279 | 0.698  | 0.485450     |
| M^5                            | -0.127453 | 0.114353 | -1.115 | 0.265042     |
| M^6                            | 0.087366  | 0.110481 | 0.791  | 0.429076     |
| M^7                            | -0.183065 | 0.114514 | -1.599 | 0.109904     |
| M^8                            | -0.033616 | 0.109295 | -0.308 | 0.758407     |
| M^9                            | -0.058331 | 0.104012 | -0.561 | 0.574925     |
| M^10                           | -0.045047 | 0.104183 | -0.432 | 0.665461     |
| M^11                           | 0.032735  | 0.100299 | 0.326  | 0.744141     |
| GPanah (Speargun)              | -0.193429 | 0.269499 | -0.718 | 0.472921     |
| GPancing tonda (Troll line)    | -0.460531 | 0.210733 | -2.185 | 0.028861 *   |
| GPancing ulur (Handline)       | -0.553664 | 0.202646 | -2.732 | 0.006292 **  |
| GRawai dasar (Bottom longline) | -0.588381 | 0.172623 | -3.408 | 0.000653 *** |

Signif. codes: 0 '\*\*\*' 0.001 '\*\*' 0.01 '\*' 0.05 '.' 0.1 ' ' 1

Approximate significance of smooth terms:

|                 | edf    | Ref.df | Chi.sq | p-value  |
|-----------------|--------|--------|--------|----------|
| s(TH)           | 15.953 | 18.955 | 35.098 | 0.0136 * |
| s(Depth)        | 7.467  | 8.384  | 12.372 | 0.2194   |
| s(GT)           | 1.000  | 1.001  | 0.036  | 0.8507   |
| s(P_Pmaculatus) | 2.770  | 3.479  | 3.674  | 0.4000   |

Signif. codes: 0 '\*\*\*' 0.001 '\*\*' 0.01 '\*' 0.05 '.' 0.1 ' ' 1

R-sq.(adj) = 0.0954 Deviance explained = 22.6%  
 UBRE = -0.36973 Scale est. = 1 n = 773

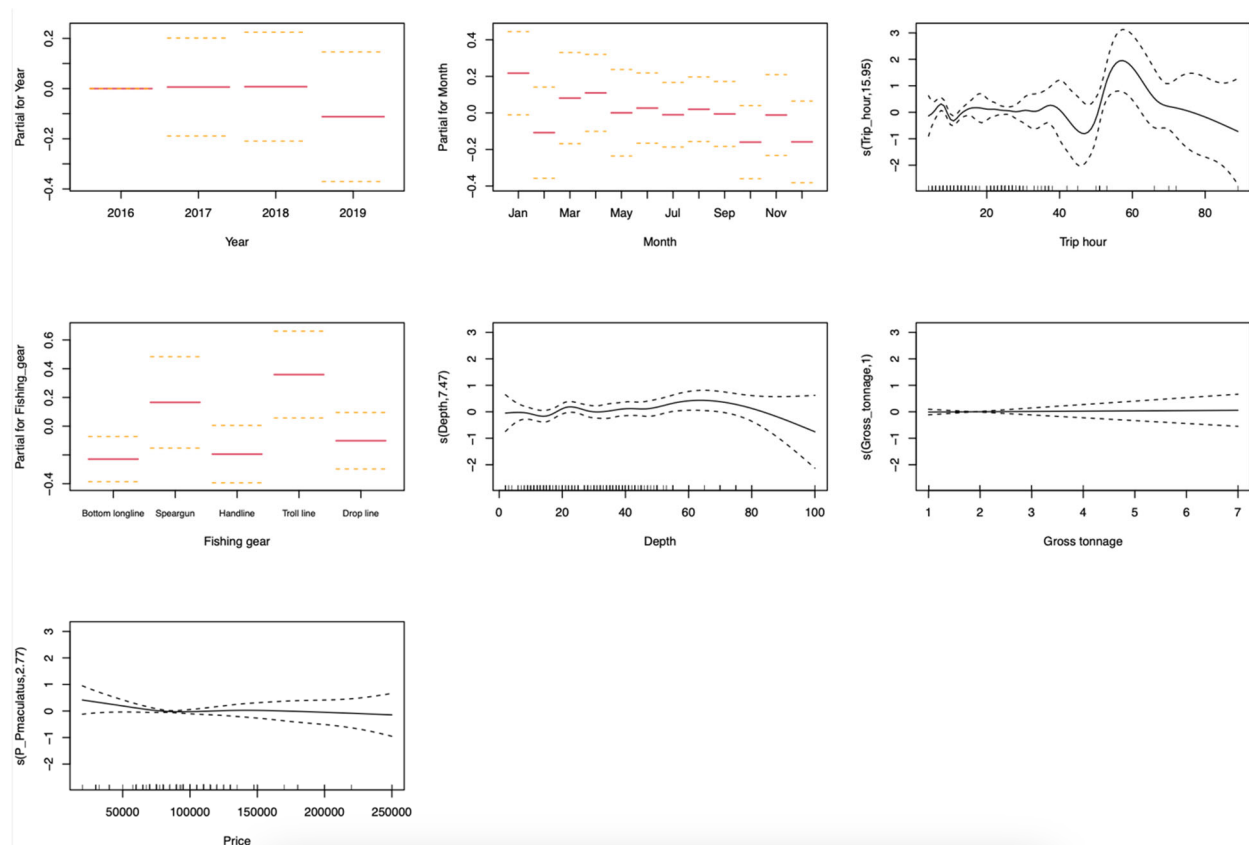

### 3.2.3 *Epinephelus coioides*

Family: poisson  
Link function: log

Formula:  
Ecoioides ~ Y2 + M + s(TH, bs = "cr", k = 38) + G + s(Depth,  
bs = "cr") + s(GT, bs = "cr", k = 4) + s(P\_Ecoioides, bs = "cr",  
k = 30)

Parametric coefficients:

|                                | Estimate  | Std. Error | z value | Pr(> z ) |   |
|--------------------------------|-----------|------------|---------|----------|---|
| (Intercept)                    | 0.543799  | 0.301379   | 1.804   | 0.0712   | . |
| Y22017                         | -0.202520 | 0.131894   | -1.535  | 0.1247   |   |
| Y22018                         | -0.313631 | 0.147029   | -2.133  | 0.0329   | * |
| Y22019                         | -0.356263 | 0.153436   | -2.322  | 0.0202   | * |
| M.L                            | -0.111202 | 0.138076   | -0.805  | 0.4206   |   |
| M.Q                            | -0.122480 | 0.137020   | -0.894  | 0.3714   |   |
| M.C                            | 0.037586  | 0.124174   | 0.303   | 0.7621   |   |
| M^4                            | -0.056876 | 0.122444   | -0.465  | 0.6423   |   |
| M^5                            | -0.128820 | 0.118554   | -1.087  | 0.2772   |   |
| M^6                            | 0.160748  | 0.106940   | 1.503   | 0.1328   |   |
| M^7                            | -0.036199 | 0.107466   | -0.337  | 0.7362   |   |
| M^8                            | 0.002711  | 0.099924   | 0.027   | 0.9784   |   |
| M^9                            | -0.072078 | 0.087752   | -0.821  | 0.4114   |   |
| M^10                           | -0.125074 | 0.096509   | -1.296  | 0.1950   |   |
| M^11                           | 0.003814  | 0.100429   | 0.038   | 0.9697   |   |
| GPanah (Speargun)              | 0.223374  | 0.316592   | 0.706   | 0.4805   |   |
| GPancing tonda (Troll line)    | -0.252144 | 0.417531   | -0.604  | 0.5459   |   |
| GPancing ulur (Handline)       | -0.310146 | 0.309564   | -1.002  | 0.3164   |   |
| GRawai dasar (Bottom longline) | 0.067150  | 0.279642   | 0.240   | 0.8102   |   |

---

Signif. codes: 0 '\*\*\*' 0.001 '\*\*' 0.01 '\*' 0.05 '.' 0.1 ' ' 1

Approximate significance of smooth terms:

|                | edf    | Ref.df | Chi.sq | p-value |   |
|----------------|--------|--------|--------|---------|---|
| s(TH)          | 4.519  | 5.578  | 11.971 | 0.0467  | * |
| s(Depth)       | 2.380  | 3.029  | 4.642  | 0.2085  |   |
| s(GT)          | 1.001  | 1.001  | 0.152  | 0.6965  |   |
| s(P_Ecoioides) | 18.895 | 21.285 | 25.765 | 0.2225  |   |

---

Signif. codes: 0 '\*\*\*' 0.001 '\*\*' 0.01 '\*' 0.05 '.' 0.1 ' ' 1

R-sq.(adj) = 0.16 Deviance explained = 21.9%  
UBRE = -0.54159 Scale est. = 1 n = 887

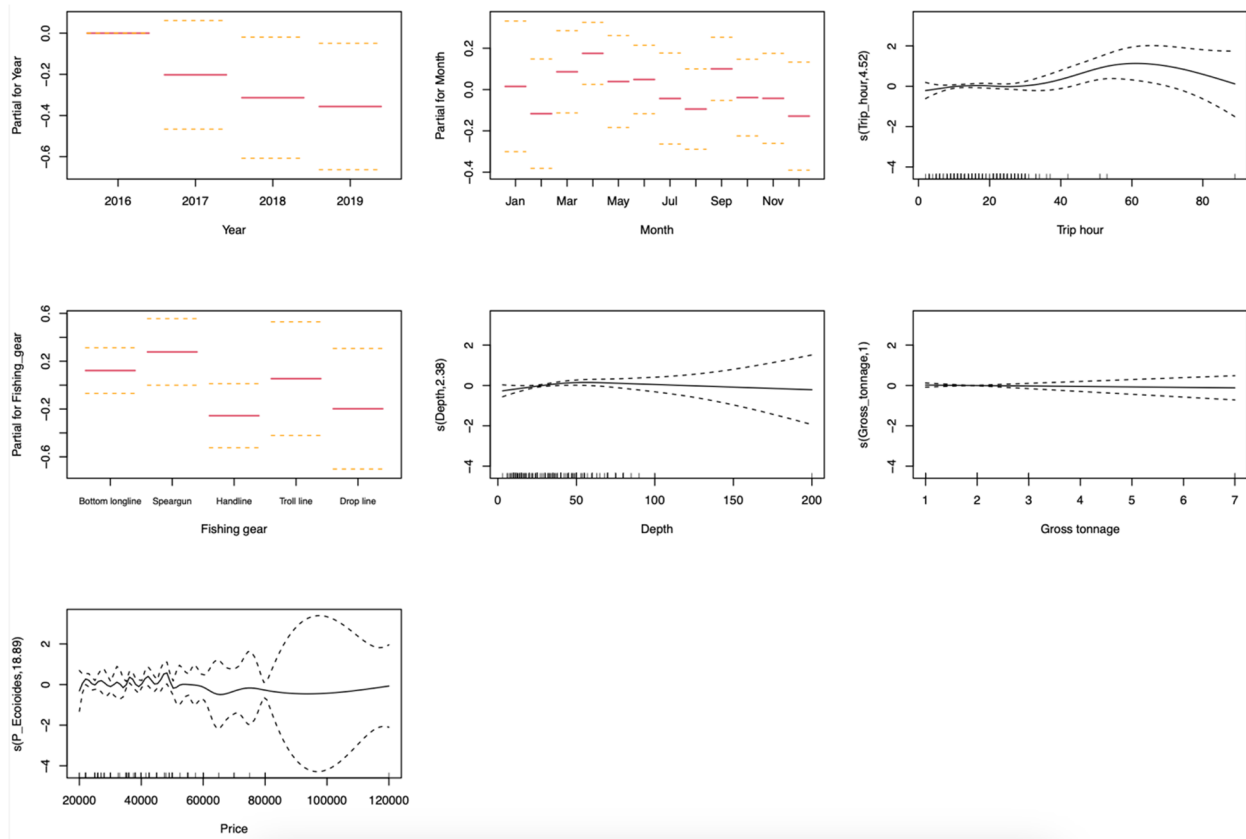

### 3.2.4 *Lutjanus malabaricus*

Family: poisson  
Link function: log

Formula:  
Lmalabaricus ~ Year + Month + s(Trip\_hour, bs = "cr", k = 20) +  
Fishing\_gear + s(Depth, bs = "cr", k = 30) + s(P\_Lmalabaricus,  
bs = "cr", k = 11)

Parametric coefficients:

|                | Estimate  | Std. Error | z value | Pr(> z ) |     |
|----------------|-----------|------------|---------|----------|-----|
| (Intercept)    | 0.624322  | 0.147930   | 4.220   | 2.44e-05 | *** |
| Year2017       | -0.356202 | 0.106593   | -3.342  | 0.000833 | *** |
| Year2018       | -0.246113 | 0.124655   | -1.974  | 0.048341 | *   |
| Year2019       | -0.206029 | 0.114901   | -1.793  | 0.072957 | .   |
| Month.L        | -0.234494 | 0.142077   | -1.650  | 0.098846 | .   |
| Month.Q        | -0.027380 | 0.143014   | -0.191  | 0.848174 |     |
| Month.C        | 0.058143  | 0.134855   | 0.431   | 0.666360 |     |
| Month^4        | -0.194738 | 0.122801   | -1.586  | 0.112784 |     |
| Month^5        | 0.001696  | 0.113035   | 0.015   | 0.988030 |     |
| Month^6        | -0.164735 | 0.100722   | -1.636  | 0.101934 |     |
| Month^7        | -0.034426 | 0.097580   | -0.353  | 0.724243 |     |
| Month^8        | -0.138172 | 0.090879   | -1.520  | 0.128413 |     |
| Month^9        | -0.168797 | 0.086959   | -1.941  | 0.052244 | .   |
| Month^10       | -0.025101 | 0.094217   | -0.266  | 0.789919 |     |
| Month^11       | -0.021037 | 0.098688   | -0.213  | 0.831200 |     |
| Fishing_gear.L | 0.173981  | 0.211168   | 0.824   | 0.409997 |     |
| Fishing_gear.Q | 0.205117  | 0.184657   | 1.111   | 0.266653 |     |
| Fishing_gear.C | -0.451333 | 0.349723   | -1.291  | 0.196863 |     |
| Fishing_gear^4 | 0.026124  | 0.266494   | 0.098   | 0.921908 |     |

```

---
Signif. codes:  0 '***' 0.001 '**' 0.01 '*' 0.05 '.' 0.1 ' ' 1

```

Approximate significance of smooth terms:

|                   | edf   | Ref.df | Chi.sq | p-value      |
|-------------------|-------|--------|--------|--------------|
| s(Trip_hour)      | 5.338 | 6.710  | 11.646 | 0.101990     |
| s(Depth)          | 4.795 | 5.949  | 5.517  | 0.448351     |
| s(P_Lmalabaricus) | 4.994 | 5.779  | 24.297 | 0.000441 *** |

```

---
Signif. codes:  0 '***' 0.001 '**' 0.01 '*' 0.05 '.' 0.1 ' ' 1

```

R-sq.(adj) = 0.116    Deviance explained = 19%  
 UBRE = -0.47869    Scale est. = 1            n = 884

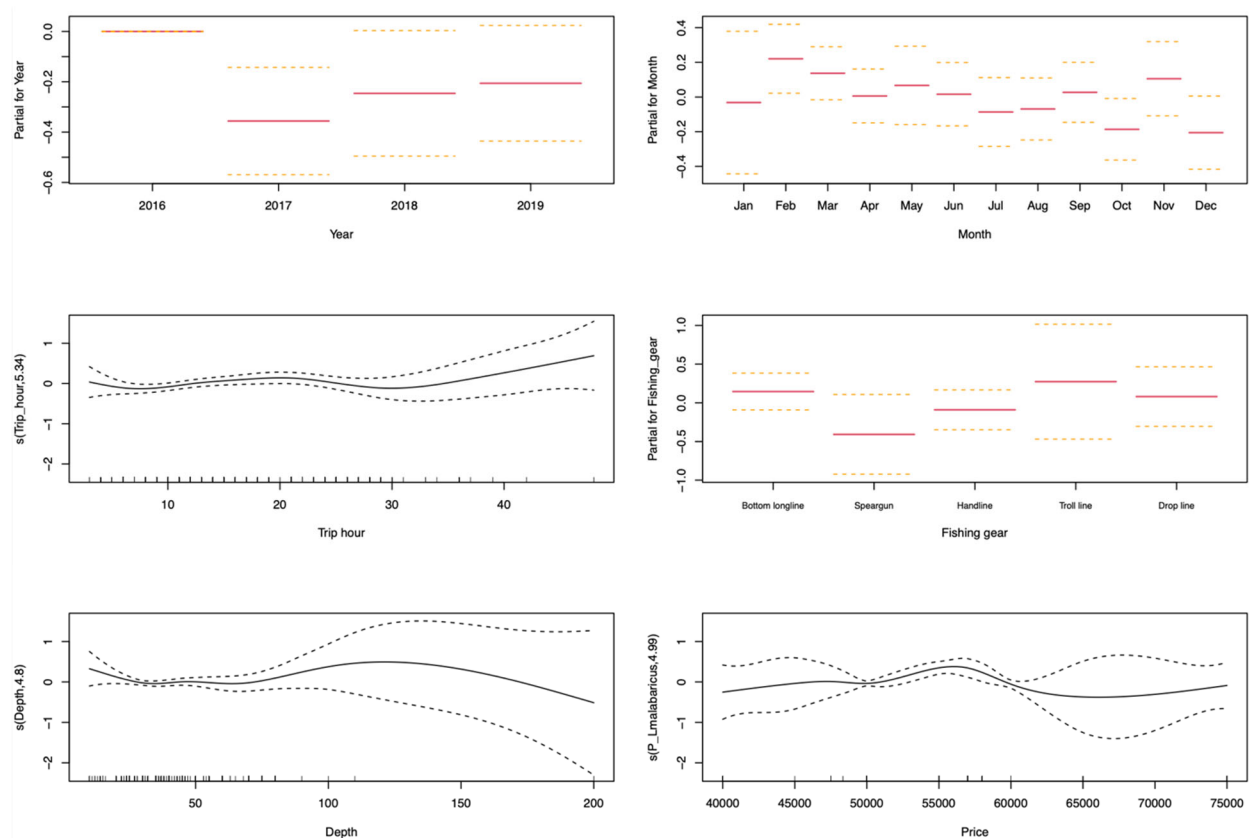

Supplement: s1 [file s1]
