# Supplementary material for: Untangling the Complexity of Small-Scale Fisheries: Building an Understanding of Grouper-Snapper Fisheries Dynamics in Saleh Bay, West Nusa Tenggara, Indonesia
Source: MDPI journal article supplement (doi:10.3390/fishes9010002), 2023-12-19
Supplement: s1 [file s1]

**Supplementary Materials Table S1.** List of fish family and species, including catch in weight (kg) and number from the fish landing monitoring in Saleh Bay, West Nusa Tenggara 2016-2019.

| Family        | Species                              | Catch (kg) | % kg<br>Catch | Catch<br>(number) | % number of<br>catch |
|---------------|--------------------------------------|------------|---------------|-------------------|----------------------|
| Acanthuridae  | not identified                       | 1.1        | 0.01          | 1                 | 0.01                 |
| Caesionidae   | not identified                       | 6.8        | 0.05          | 31                | 0.38                 |
| Carangidae    | Others                               | 68.7       | 0.49          | 17                | 0.21                 |
| Carangidae    | <i>Alectis indica</i>                | 2.1        | 0.01          | 1                 | 0.01                 |
| Carangidae    | <i>Carangoides coeruleopinnatus</i>  | 0.4        | 0.00          | 1                 | 0.01                 |
| Carangidae    | <i>Caranx ignobilis</i>              | 3.1        | 0.02          | 2                 | 0.02                 |
| Epinephelidae | <i>Aethaloperca rogaa</i>            | 15.1       | 0.11          | 20                | 0.25                 |
| Epinephelidae | <i>Anypserodon leucogrammicus</i>    | 2.4        | 0.02          | 3                 | 0.04                 |
| Epinephelidae | <i>Cephalopholis argus</i>           | 0.5        | 0.00          | 1                 | 0.01                 |
| Epinephelidae | <i>Cephalopholis boenak</i>          | 0.1        | 0.00          | 1                 | 0.01                 |
| Epinephelidae | <i>Cephalopholis cyanostigma</i>     | 2.1        | 0.01          | 6                 | 0.07                 |
| Epinephelidae | <i>Cephalopholis miniata</i>         | 33.6       | 0.24          | 64                | 0.79                 |
| Epinephelidae | <i>Cephalopholis sexmaculata</i>     | 12.0       | 0.09          | 23                | 0.28                 |
| Epinephelidae | <i>Cephalopholis sonnerati</i>       | 47.2       | 0.33          | 51                | 0.63                 |
| Epinephelidae | <i>Cromileptes altivelis</i>         | 130.9      | 0.93          | 224               | 2.75                 |
| Epinephelidae | <i>Epinephelus areolatus</i>         | 16.3       | 0.12          | 33                | 0.41                 |
| Epinephelidae | <i>Epinephelus bleekeri</i>          | 170.8      | 1.21          | 146               | 1.79                 |
| Epinephelidae | <i>Epinephelus coeruleopunctatus</i> | 1.0        | 0.01          | 1                 | 0.01                 |
| Epinephelidae | <i>Epinephelus coioides</i>          | 3795.8     | 26.82         | 1365              | 16.76                |
| Epinephelidae | <i>Epinephelus corallicola</i>       | 36.2       | 0.26          | 38                | 0.47                 |
| Epinephelidae | <i>Epinephelus epistictus</i>        | 482.2      | 3.41          | 131               | 1.61                 |
| Epinephelidae | <i>Epinephelus fasciatus</i>         | 5.6        | 0.04          | 18                | 0.22                 |
| Epinephelidae | <i>Epinephelus fuscoguttatus</i>     | 633.6      | 4.48          | 224               | 2.75                 |
| Epinephelidae | <i>Epinephelus maculatus</i>         | 24.1       | 0.17          | 18                | 0.22                 |
| Epinephelidae | <i>Epinephelus malabaricus</i>       | 534.9      | 3.78          | 229               | 2.81                 |
| Epinephelidae | <i>Epinephelus ongus</i>             | 1.6        | 0.01          | 4                 | 0.05                 |
| Epinephelidae | <i>Epinephelus poecilonotus</i>      | 46.3       | 0.33          | 12                | 0.15                 |
| Epinephelidae | <i>Epinephelus polyphekadion</i>     | 119.3      | 0.84          | 87                | 1.07                 |
| Epinephelidae | <i>Epinephelus quoyanus</i>          | 3.5        | 0.02          | 9                 | 0.11                 |
| Epinephelidae | <i>Epinephelus radiatus</i>          | 4.1        | 0.03          | 4                 | 0.05                 |
| Epinephelidae | <i>Epinephelus sp.</i>               | 5.3        | 0.04          | 2                 | 0.02                 |
| Epinephelidae | <i>Epinephelus spilotoceps</i>       | 1.2        | 0.01          | 1                 | 0.01                 |
| Epinephelidae | <i>Epinephelus undulosus</i>         | 10.9       | 0.08          | 3                 | 0.04                 |
| Epinephelidae | <i>Hyporthodus octofasciatus</i>     | 12.1       | 0.09          | 1                 | 0.01                 |
| Epinephelidae | <i>Plectropomus areolatus</i>        | 91.1       | 0.64          | 113               | 1.39                 |
| Epinephelidae | <i>Plectropomus laevis</i>           | 0.3        | 0.00          | 1                 | 0.01                 |

|               |                                      |        |       |      |       |
|---------------|--------------------------------------|--------|-------|------|-------|
| Epinephelidae | <i>Plectropomus leopardus</i>        | 1788.8 | 12.64 | 1732 | 21.27 |
| Epinephelidae | <i>Plectropomus maculatus</i>        | 1484.1 | 10.49 | 1222 | 15.01 |
| Epinephelidae | <i>Plectropomus oligacanthus</i>     | 149.8  | 1.06  | 157  | 1.93  |
| Epinephelidae | <i>Variola albimarginata</i>         | 10.4   | 0.07  | 24   | 0.29  |
| Epinephelidae | <i>Variola louti</i>                 | 5.4    | 0.04  | 7    | 0.09  |
| Haemulidae    | <i>Diagramma pictum</i>              | 4.0    | 0.03  | 1    | 0.01  |
| Haemulidae    | <i>Plectorhinchus flavomaculatus</i> | 5.0    | 0.04  | 2    | 0.02  |
| Lethrinidae   | <i>Lethrinus harak</i>               | 1.6    | 0.01  | 1    | 0.01  |
| Lethrinidae   | <i>Lethrinus lentjan</i>             | 3.9    | 0.03  | 11   | 0.14  |
| Lethrinidae   | <i>Lethrinus microdon</i>            | 15.6   | 0.11  | 5    | 0.06  |
| Lethrinidae   | <i>Lethrinus olivaceus</i>           | 12.6   | 0.09  | 4    | 0.05  |
| Lethrinidae   | <i>Lethrinus sp.</i>                 | 0.6    | 0.00  | 2    | 0.02  |
| Lethrinidae   | <i>Lethrinus xanthochilus</i>        | 1.3    | 0.01  | 1    | 0.01  |
| Lutjanidae    | <i>Etelis carbunculus</i>            | 53.3   | 0.38  | 10   | 0.12  |
| Lutjanidae    | <i>Etelis sp.</i>                    | 2.4    | 0.02  | 1    | 0.01  |
| Lutjanidae    | <i>Lipocheilus carnolabrum</i>       | 2.5    | 0.02  | 1    | 0.01  |
| Lutjanidae    | <i>Lutjanus argentimaculatus</i>     | 259.3  | 1.83  | 97   | 1.19  |
| Lutjanidae    | <i>Lutjanus bohar</i>                | 45.1   | 0.32  | 19   | 0.23  |
| Lutjanidae    | <i>Lutjanus carponotatus</i>         | 5.2    | 0.04  | 11   | 0.14  |
| Lutjanidae    | <i>Lutjanus decussatus</i>           | 2.0    | 0.01  | 10   | 0.12  |
| Lutjanidae    | <i>Lutjanus erythropterus</i>        | 1.6    | 0.01  | 1    | 0.01  |
| Lutjanidae    | <i>Lutjanus johnii</i>               | 181.7  | 1.28  | 55   | 0.68  |
| Lutjanidae    | <i>Lutjanus malabaricus</i>          | 3561.5 | 25.17 | 1728 | 21.22 |
| Lutjanidae    | <i>Lutjanus monostigma</i>           | 12.9   | 0.09  | 4    | 0.05  |
| Lutjanidae    | <i>Lutjanus quinquelineatus</i>      | 0.1    | 0.00  | 1    | 0.01  |
| Lutjanidae    | <i>Lutjanus rivulatus</i>            | 10.9   | 0.08  | 6    | 0.07  |
| Lutjanidae    | <i>Lutjanus sebae</i>                | 0.6    | 0.00  | 1    | 0.01  |
| Lutjanidae    | <i>Lutjanus timoriensis</i>          | 77.5   | 0.55  | 47   | 0.58  |
| Lutjanidae    | <i>Lutjanus vitta</i>                | 2.0    | 0.01  | 7    | 0.09  |
| Lutjanidae    | <i>Pinjalo lewisi</i>                | 3.0    | 0.02  | 3    | 0.04  |
| Lutjanidae    | <i>Pristipomoides filamentosus</i>   | 0.7    | 0.00  | 1    | 0.01  |
| Lutjanidae    | <i>Pristipomoides multidentatus</i>  | 46.9   | 0.33  | 21   | 0.26  |
| Lutjanidae    | <i>Pristipomoides typus</i>          | 5.8    | 0.04  | 4    | 0.05  |
| Nemipteridae  | <i>Nemipterus hexodon</i>            | 1.2    | 0.01  | 6    | 0.07  |
| Nemipteridae  | <i>Nemipterus sp.</i>                | 0.1    | 0.00  | 1    | 0.01  |
| Nemipteridae  | <i>Scolopsis monogramma</i>          | 0.6    | 0.00  | 1    | 0.01  |
| Scaridae      | Others                               | 10.6   | 0.07  | 20   | 0.25  |
| Scaridae      | <i>Bolbometopon muricatum</i>        | 1.3    | 0.01  | 1    | 0.01  |
| Serranidae    | <i>Caprodon schlegelii</i>           | 3.7    | 0.03  | 2    | 0.02  |
| Serranidae    | <i>Gigantias serratospinosus</i>     | 10.2   | 0.07  | 7    | 0.09  |
| Serranidae    | <i>Plectranthias retrofasciatus</i>  | 0.8    | 0.01  | 1    | 0.01  |
| Siganidae     | Others                               | 4.0    | 0.03  | 20   | 0.25  |

|              |                            |         |       |       |        |
|--------------|----------------------------|---------|-------|-------|--------|
| Siganidae    | <i>Siganus guttatus</i>    | 0.3     | 0.00  | 1     | 0.01   |
| Sphyraenidae | <i>Sphyraena barracuda</i> | 38.0    | 0.27  | 0     | 0.00   |
| Others       | -                          | 10027.2 | 70.86 | 16807 | 206.40 |
